# Supplementary material for: Age-Related Increases in IGFBP2 Increase Melanoma Cell Invasion and Lipid Synthesis
Source: PubMed Central journal article supplement (PMC11295880; doi:10.1158/2767-9764.crc-23-0176), 2024-08-02
Supplement: crc-23-0176_supplemental_figure_3_supps3.pdf [file crc-23-0176_supplemental_figure_3_supps3.pdf]

### Supplemental Figure 3

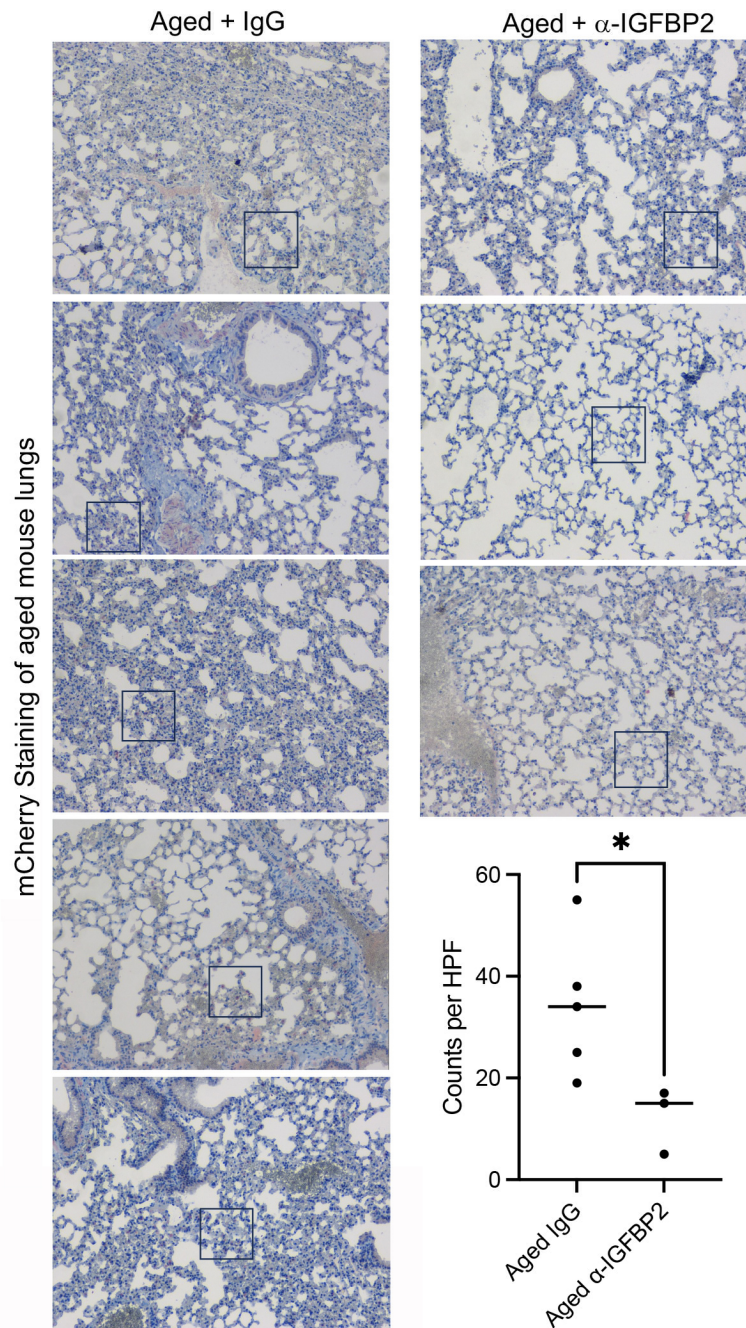

**Supplemental Figure 3. Inhibiting IGFBP2 reduces metastasis.** Analysis of mCherry positive cells in lungs of tumor bearing aged mice treated with a neutralizing IGFBP2 antibody or IgG control, larger fields of view of images from Figure 4 (boxes indicate areas imaged for Figure 4). \* Indicates  $p < 0.05$  student t-test was used.
